# Supplementary material
Source: PubMed Central journal article supplement (PMC4402341)

# NHBE 24h

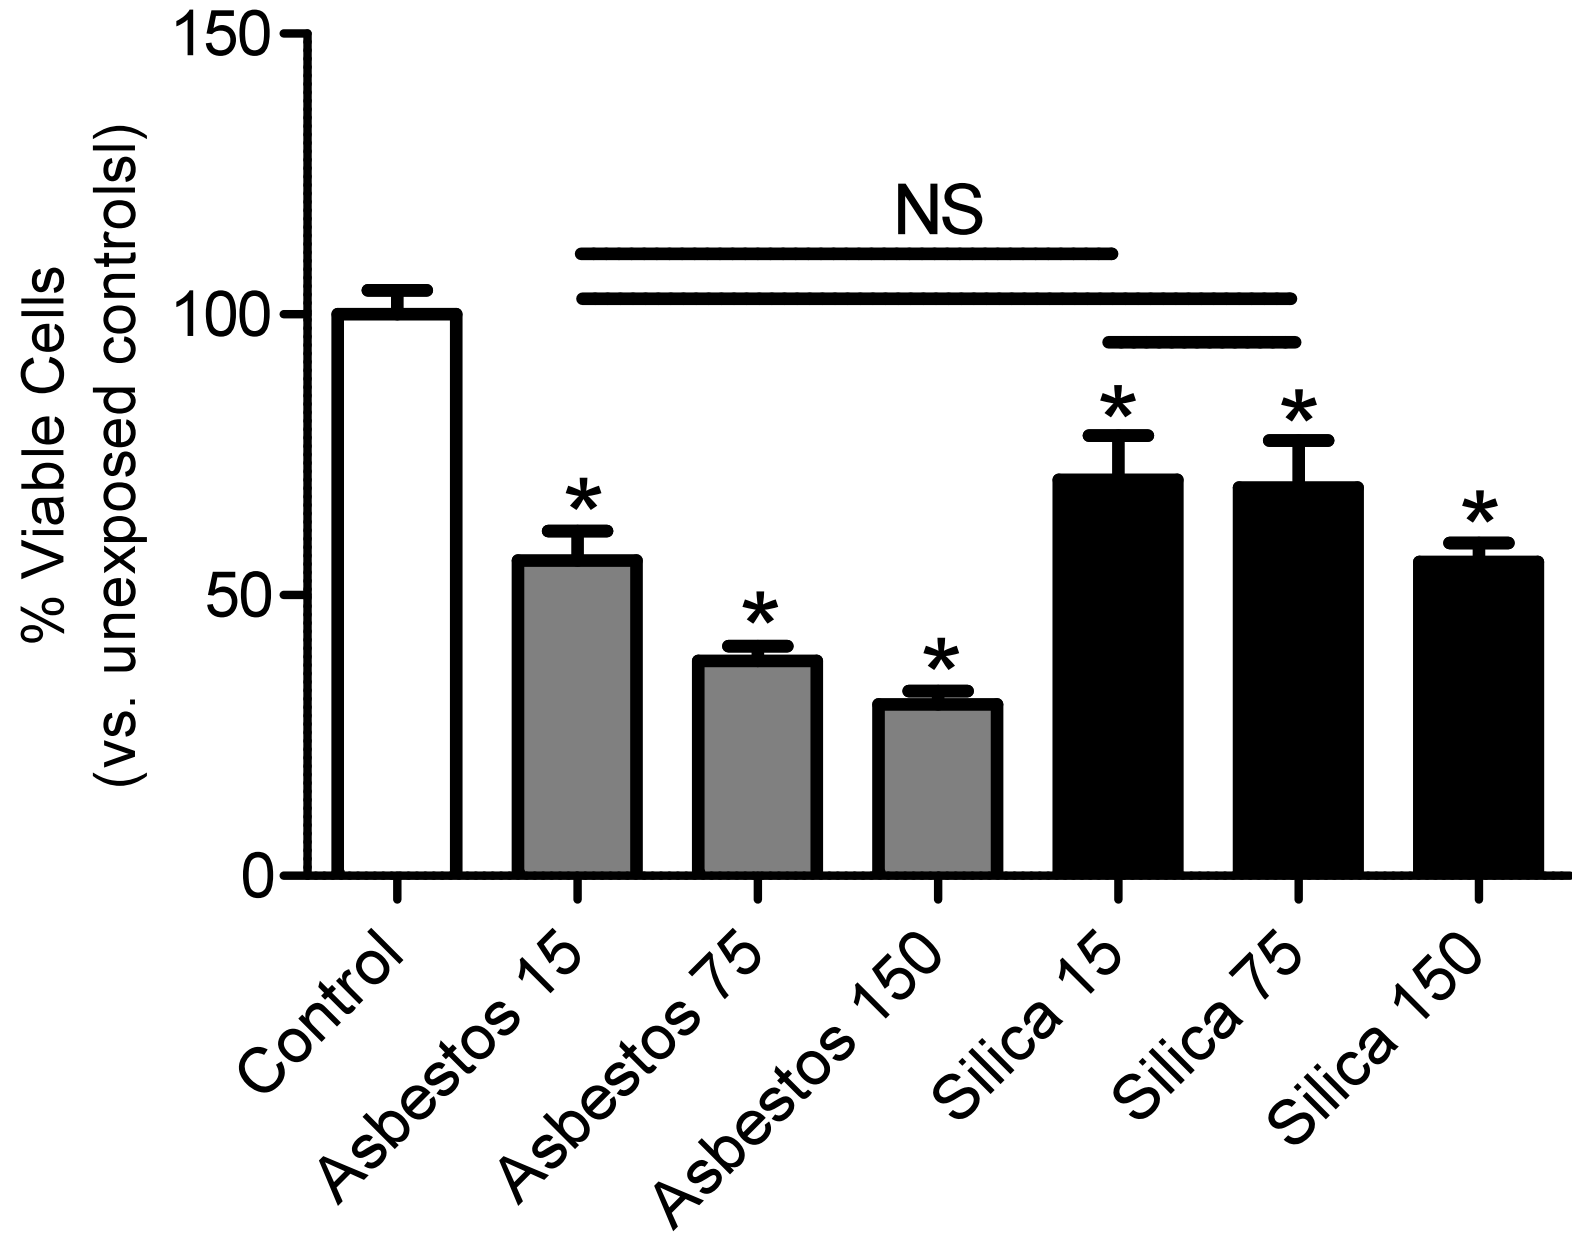

Supplement: supp_ddu551_ddu551supp_fig1.pdf [file supp_ddu551_ddu551supp_fig1.pdf]

# BEAS2B 24h

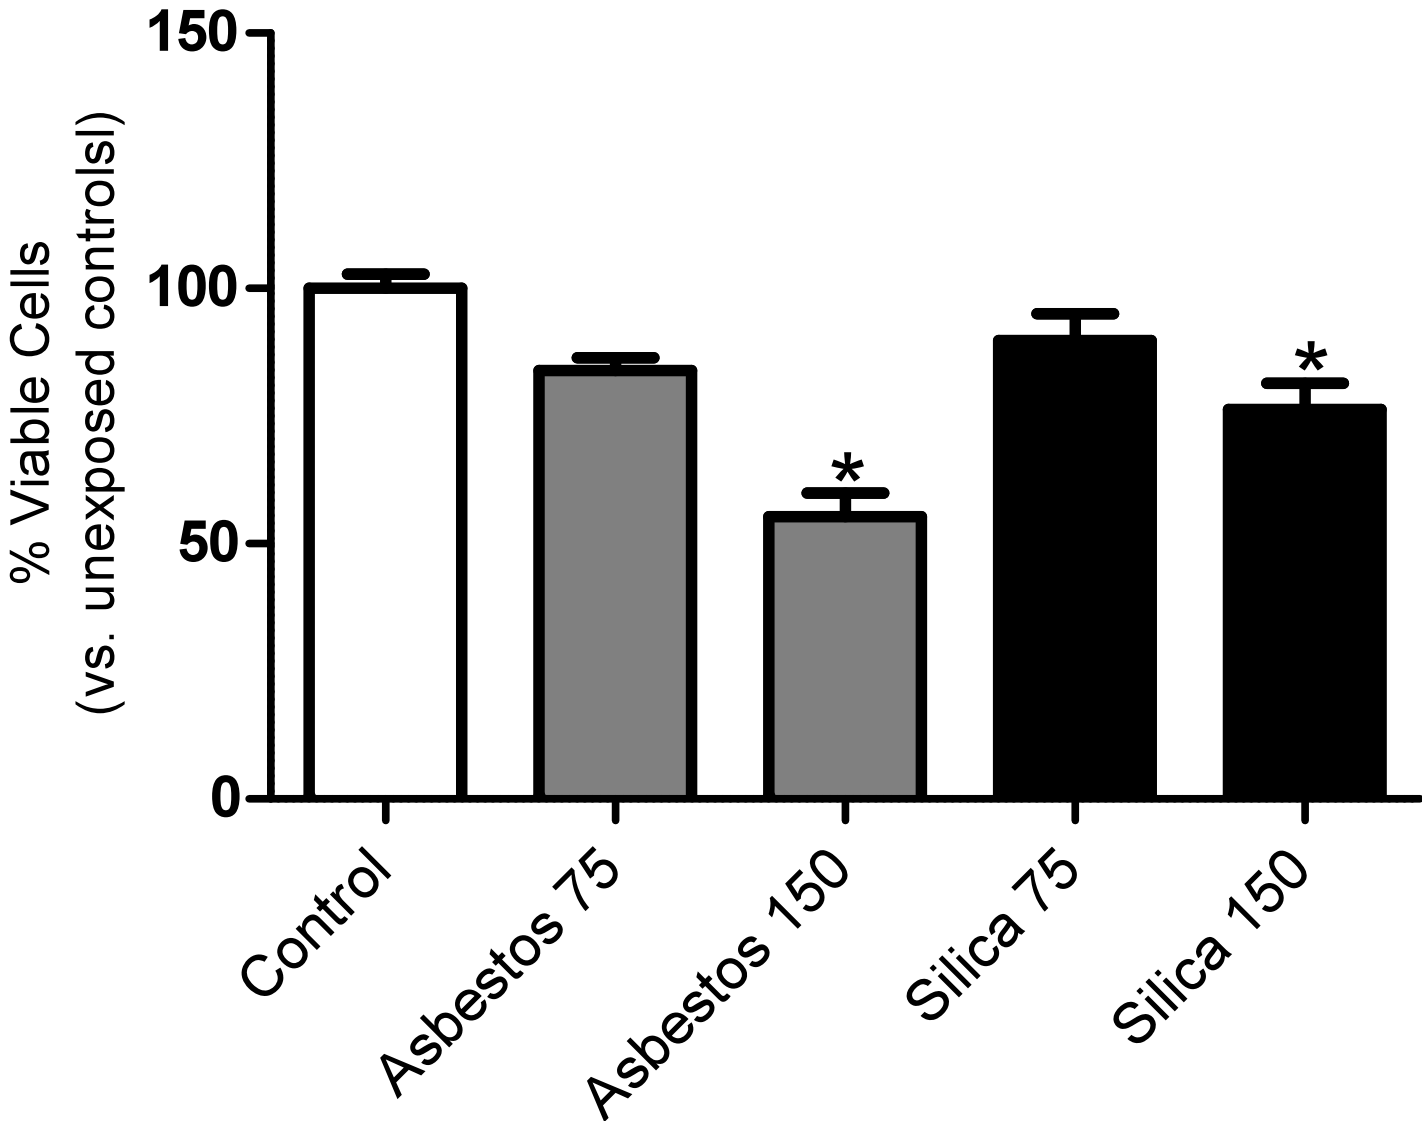

Supplement: supp_ddu551_ddu551supp_fig2.pdf [file supp_ddu551_ddu551supp_fig2.pdf]

Fold change mRNA  
(normalized to *HPRT1*)

*IL8*

*MMP1*

*BIRC3*

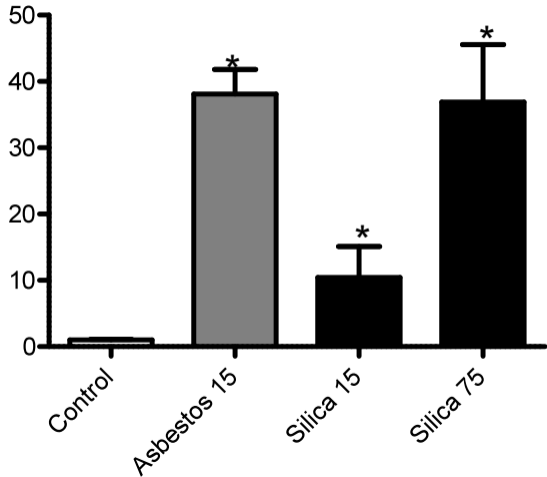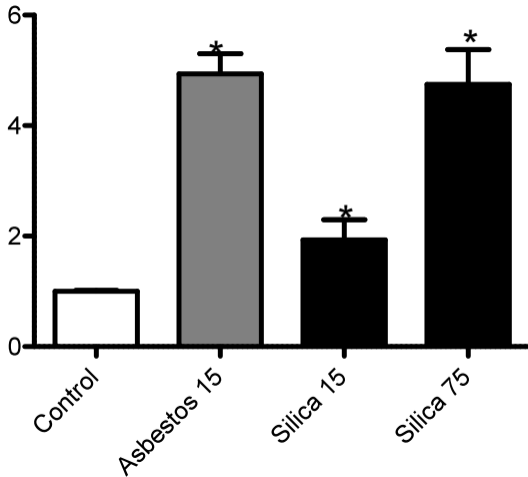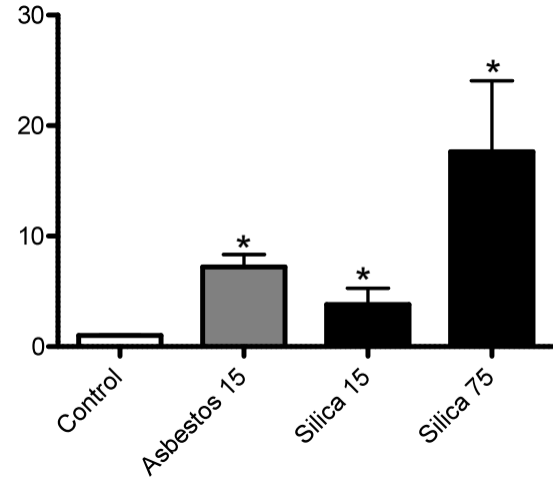

Supplement: supp_ddu551_ddu551supp_fig3.pdf [file supp_ddu551_ddu551supp_fig3.pdf]
